# Supplementary material for: Combining silver- and organocatalysis: an enantioselective sequential catalytic approach towards pyrano-annulated pyrazoles
Source: Royal Society of Chemistry journal article supplement (doi:10.1039/c4cc09495f), 2014-12-23
Supplement: c4cc09495f1.pdf [file c4cc09495f1.pdf]

Sample Name: YM 26-1 rac  
Data file: D:\GONZO\YM\26-1R2AD.D  
Sample Info: Laufmittel: n-Heptan/IP 9:1;  
Die Probe ist in EtOH/DCM/LM gelöst.

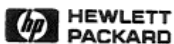

Säule: DAICELAD.M  
Säuleninfo: Chiralpak AD (250x4,6)mm  
Operator: Analytik Labor AKEN

Injektion Time: 11:06:50  
Injektion Date: 18.03.2014

| Instrument Conditions: | At Start | At Stop |
|------------------------|----------|---------|
| Temperature in °C:     | 30.0 °C  | 30.0 °C |
| Pressure in bar:       | 16.8     | 16.9    |
| Flow in ml/min:        | 0.70     | 0.70    |

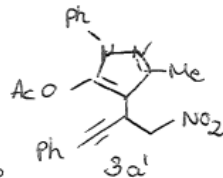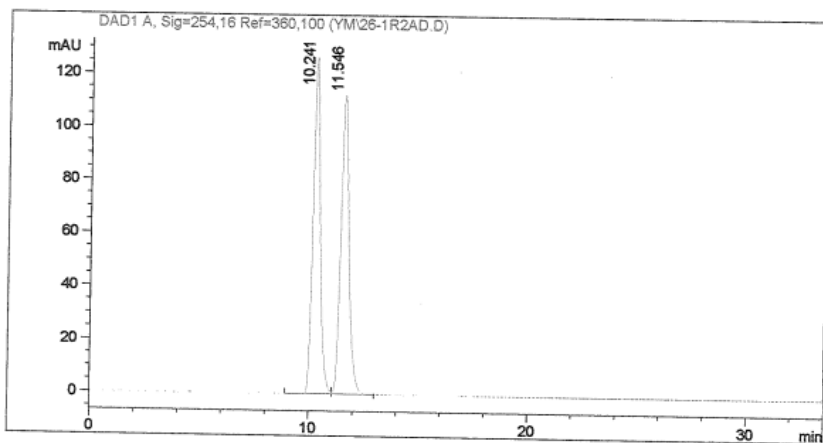

| #     | Ret. Time (min) | Width | Height (mAU) | Area (mAU*s) | Area % |
|-------|-----------------|-------|--------------|--------------|--------|
| 1     | 10.24           | 0.35  | 126.55       | 2922.80      | 49.94  |
| 2     | 11.55           | 0.39  | 112.50       | 2929.73      | 50.06  |
| Total |                 |       |              | 5852.53      | 100.00 |

Sample Name: YM 78-1  
Data file: D:\GONZO\YM\78-1AD.D  
Sample Info: Laufmittel: n-Heptan/IP 9:1;  
Die Probe ist in LM/DCM gelöst.

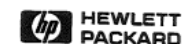

Säule: DAICELAD.M  
Säuleninfo: Chiralpak AD (250x4,6)mm  
Operator: Analytik Labor AKEN

Injektion Time: 11:44:29  
Injektion Date: 21.05.2014

| Instrument Conditions: | At Start | At Stop |
|------------------------|----------|---------|
| Temperature in °C:     | 30.0 °C  | 30.0 °C |
| Pressure in bar:       | 15.9     | 15.9    |
| Flow in ml/min:        | 0.70     | 0.70    |

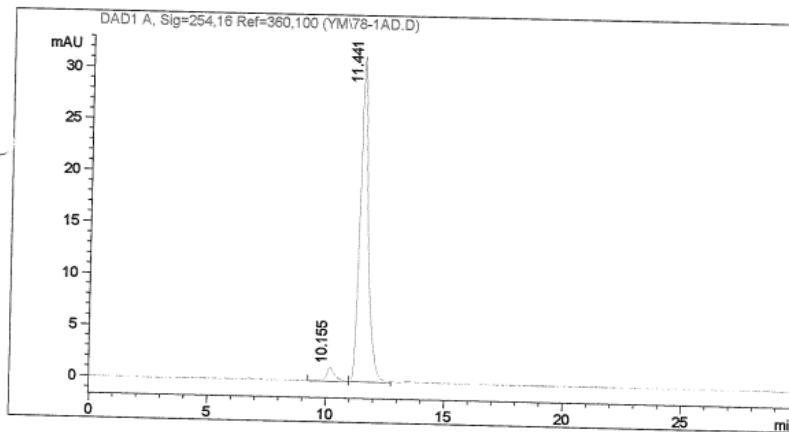

| #     | Ret. Time (min) | Width | Height (mAU) | Area (mAU*s) | Area % |
|-------|-----------------|-------|--------------|--------------|--------|
| 1     | 10.15           | 0.35  | 1.33         | 32.34        | 3.99   |
| 2     | 11.44           | 0.36  | 31.51        | 777.20       | 96.01  |
| Total |                 |       |              | 809.54       | 100.00 |

Sample Name: YM 21-2 rac  
 Data file: D:\GONZO\PC\31-2RAD.D  
 Sample Info: Laufmittel: n-Heptan/IP 97:3;  
 Die Probe ist in LM/DCM gelöst

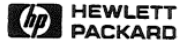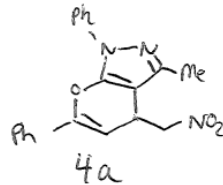

Säule: DAICELAD.M  
 Säuleninfo: Chiralpak AD (250x4,6)mm  
 Operator: Analytik Labor AKEN

Injektion Time: 10:51:52  
 Injektion Date: 24.03.2014

| Instrument Conditions: | At Start | At Stop |
|------------------------|----------|---------|
| Temperature in °C:     | 30.0°C   | 30.0°C  |
| Pressure in bar:       | 15.8     | 16.3    |
| Flow in ml/min:        | 0.70     | 0.70    |

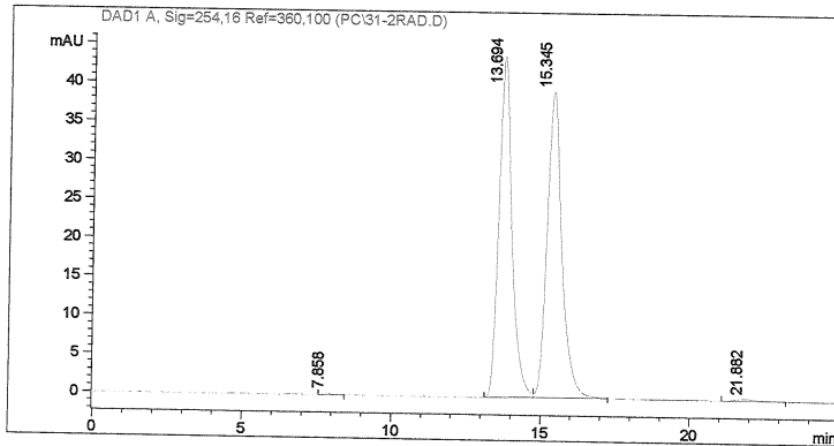

| #            | Ret. Time (min) | Width | Height (mAU) | Area (mAU*s) | Area %         |               |
|--------------|-----------------|-------|--------------|--------------|----------------|---------------|
| 1            | 7.86            | 0.25  | 0.25         | 4.62         | 0.17           |               |
| 2            | 13.69           | 0.46  | 43.92        | 1343.13      | 49.26          |               |
| 3            | 15.34           | 0.52  | 39.40        | 1365.03      | 50.06          |               |
| 4            | 21.88           | 0.64  | 0.27         | 13.92        | 0.51           |               |
| <b>Total</b> |                 |       |              |              | <b>2726.69</b> | <b>100.00</b> |

Sample Name: KD 973 A1  
 Data file: D:\GONZO\KD\973A1AD.D  
 Sample Info: Laufmittel: n-Heptan/iPrOH 97:3;  
 Die Probe ist in DCM/LM gelöst.

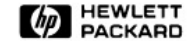

Säule: DAICELAD.M  
 Säuleninfo: Chiralpak AD (250x4,6)mm  
 Operator: Analytik Labor AKEN

Injektion Time: 11:45:56  
 Injektion Date: 13.11.2014

| Instrument Conditions: | At Start | At Stop |
|------------------------|----------|---------|
| Temperature in °C:     | 30.0°C   | 30.0°C  |
| Pressure in bar:       | 15.9     | 16.3    |
| Flow in ml/min:        | 0.70     | 0.70    |

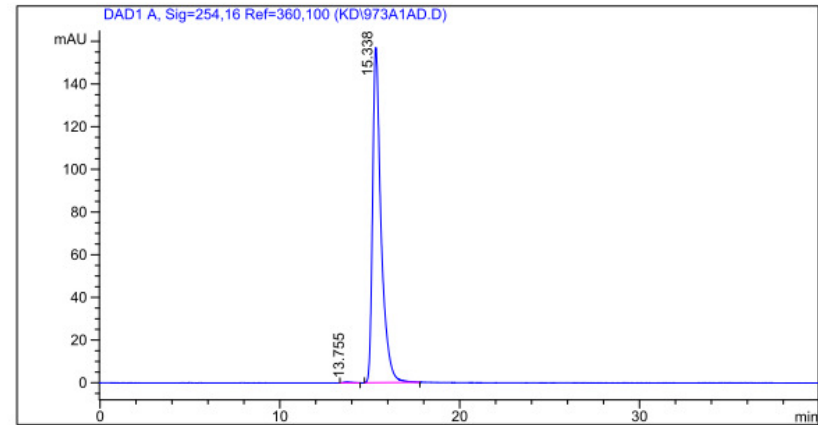

| #            | Ret. Time (min) | Width | Height (mAU) | Area (mAU*s) | Area %         |               |
|--------------|-----------------|-------|--------------|--------------|----------------|---------------|
| 1            | 13.75           | 0.32  | 0.39         | 9.97         | 0.19           |               |
| 2            | 15.34           | 0.48  | 157.03       | 5150.56      | 99.81          |               |
| <b>Total</b> |                 |       |              |              | <b>5160.53</b> | <b>100.00</b> |

Sample Name: KD 959 A rac  
 Data file: D:\GONZO\KD\959AROD.D  
 Sample Info: Laufmittel: n-Heptan/EtOH 8:2;  
 Die Probe ist in LM gelöst

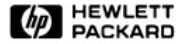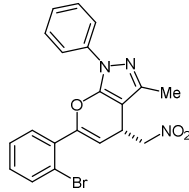

Säule: DAICELOD.M  
 Säuleninfo: Chiralcel OD (250x4,6)mm  
 Operator: Analytik Labor AKEN

Injektion Time: 12:32:12  
 Injektion Date: 24.09.2014

| Instrument Conditions: | At Start | At Stop |
|------------------------|----------|---------|
| Temperature in °C:     | 30.0 °C  | 30.0 °C |
| Pressure in bar:       | 33.2     | 34.1    |
| Flow in ml/min:        | 1.00     | 1.00    |

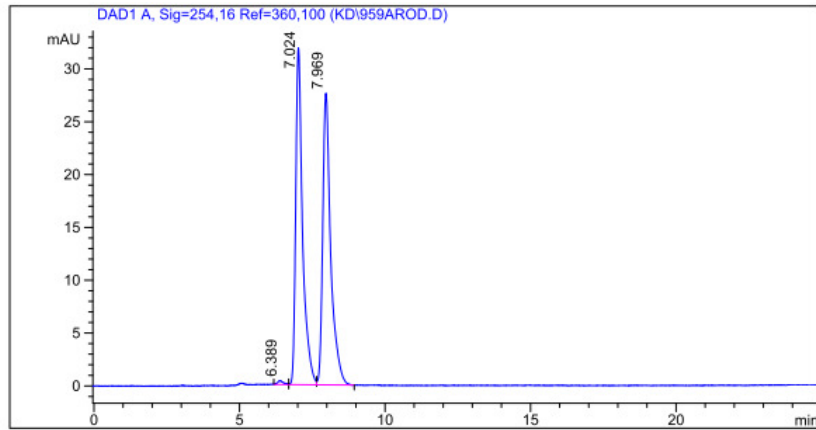

| #     | Ret. Time (min) | Width | Height (mAU) | Area (mAU*s) | Area % |
|-------|-----------------|-------|--------------|--------------|--------|
| 1     | 6.39            | 0.21  | 0.36         | 5.29         | 0.50   |
| 2     | 7.02            | 0.24  | 31.85        | 524.86       | 49.66  |
| 3     | 7.97            | 0.28  | 27.59        | 526.67       | 49.84  |
| Total |                 |       |              | 1056.81      | 100.00 |

Sample Name: KD 982 A  
 Data file: D:\GONZO\KD\982AOD.D  
 Sample Info: Laufmittel: n-Heptan/EtOH 8:2;  
 Die Probe ist in DCM/LM gelöst

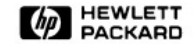

Säule: DAICELOD.M  
 Säuleninfo: Chiralcel OD (250x4,6)mm  
 Operator: Analytik Labor AKEN

Injektion Time: 11:57:00  
 Injektion Date: 31.10.2014

| Instrument Conditions: | At Start | At Stop |
|------------------------|----------|---------|
| Temperature in °C:     | 30.0 °C  | 30.0 °C |
| Pressure in bar:       | 33.6     | 34.5    |
| Flow in ml/min:        | 1.00     | 1.00    |

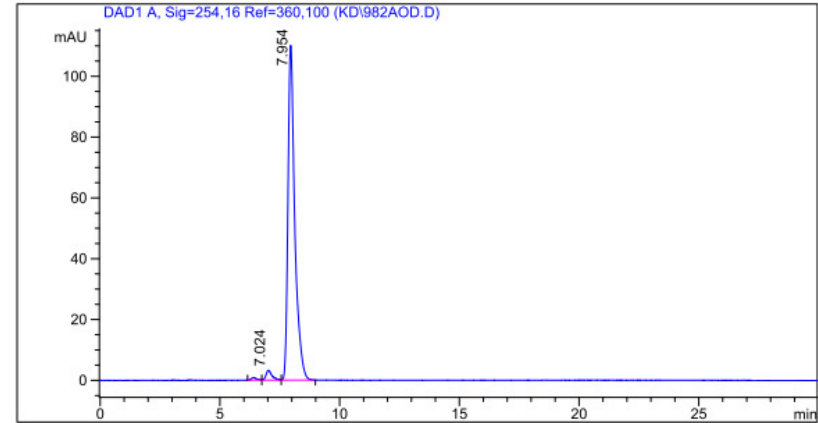

| #     | Ret. Time (min) | Width | Height (mAU) | Area (mAU*s) | Area % |
|-------|-----------------|-------|--------------|--------------|--------|
| 1     | 6.40            | 0.22  | 0.87         | 13.17        | 0.59   |
| 2     | 7.02            | 0.26  | 3.22         | 56.34        | 2.51   |
| 3     | 7.95            | 0.29  | 110.00       | 2178.70      | 96.91  |
| Total |                 |       |              | 2248.21      | 100.00 |

Sample Name: KD 929 A rac  
 Data file: D:\GONZO\KD\929ARAD.D  
 Sample Info: Laufmittel: n-Heptan/iPrOH 9:1;  
 Die Probe ist in DCM/LM gelöst.

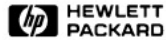

Säule: DAICELAD.M  
 Säuleninfo: Chiralpak AD (250x4,6)mm  
 Operator: Analytik Labor AKEN

Injektion Time: 11:14:07  
 Injektion Date: 07.10.2014

|                        |          |         |
|------------------------|----------|---------|
| Instrument Conditions: | At Start | At Stop |
| Temperature in °C:     | 30.0 °C  | 30.0 °C |
| Pressure in bar:       | 25.7     | 26.4    |
| Flow in ml/min:        | 1.00     | 1.00    |

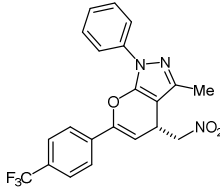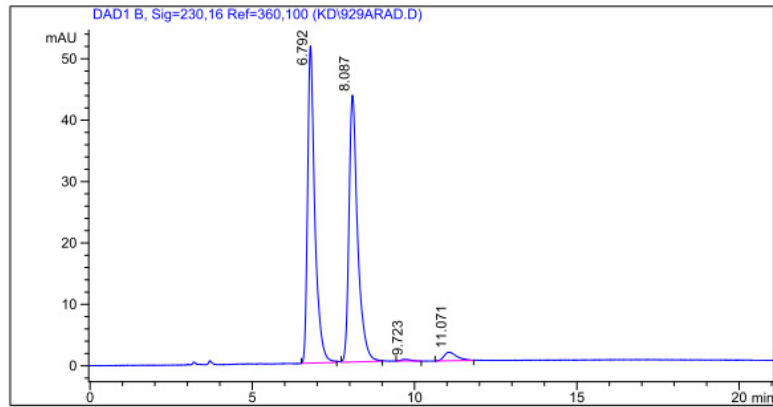

| #     | Ret. Time (min) | Width | Height (mAU) | Area (mAU*s) | Area % |
|-------|-----------------|-------|--------------|--------------|--------|
| 1     | 6.79            | 0.23  | 51.66        | 802.86       | 48.56  |
| 2     | 8.09            | 0.27  | 43.47        | 806.23       | 48.76  |
| 3     | 9.72            | 0.29  | 0.27         | 5.44         | 0.33   |
| 4     | 11.07           | 0.40  | 1.40         | 38.95        | 2.36   |
| Total |                 |       |              | 1653.47      | 100.00 |

Sample Name: KD 976 A1  
 Data file: D:\GONZO\KD\976A1AD.D  
 Sample Info: Laufmittel: n-Heptan/iPrOH 9:1;  
 Die Probe ist in DCM/LM gelöst.

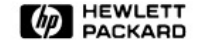

Säule: DAICELAD.M  
 Säuleninfo: Chiralpak AD (250x4,6)mm  
 Operator: Analytik Labor AKEN

Injektion Time: 10:28:16  
 Injektion Date: 14.11.2014

|                        |          |         |
|------------------------|----------|---------|
| Instrument Conditions: | At Start | At Stop |
| Temperature in °C:     | 30.0 °C  | 30.0 °C |
| Pressure in bar:       | 26.4     | 27.0    |
| Flow in ml/min:        | 1.00     | 1.00    |

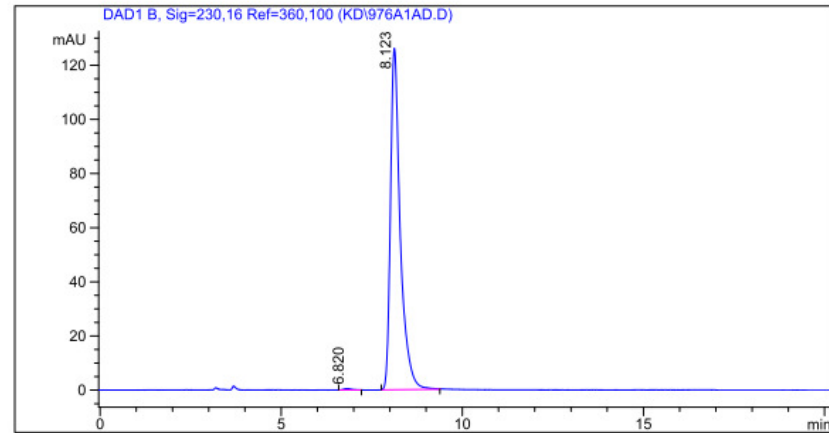

| #     | Ret. Time (min) | Width | Height (mAU) | Area (mAU*s) | Area % |
|-------|-----------------|-------|--------------|--------------|--------|
| 1     | 6.82            | 0.22  | 0.47         | 7.29         | 0.31   |
| 2     | 8.12            | 0.28  | 126.14       | 2374.81      | 99.69  |
| Total |                 |       |              | 2382.10      | 100.00 |

Sample Name: KD 955 A rac  
 Data file: D:\GONZO\KD\955ARAD.D  
 Sample Info: Laufmittel: n-Heptan/iPrOH 97:3;  
 Die Probe ist in DCM/LM gelöst.

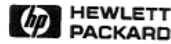

Säule: DAICELAD.M  
 Säuleninfo: Chiralpak AD (250x4,6)mm  
 Operator: Analytik Labor AKEN

Injektion Time: 11:15:21  
 Injektion Date: 22.09.2014

Instrument Conditions: At Start  
 Temperature in °C: 30.0 °C  
 Pressure in bar: 24.5  
 Flow in ml/min: 1.00

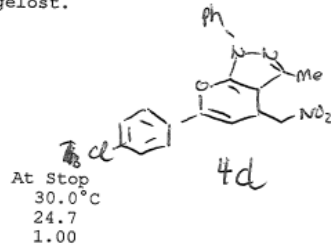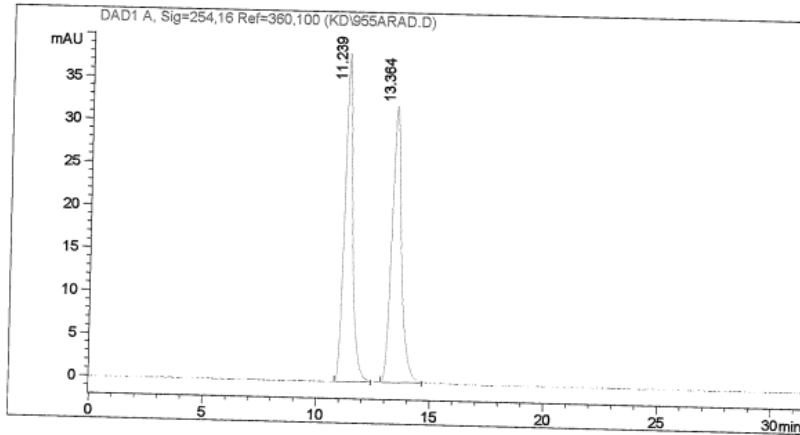

| #     | Ret. Time (min) | Width | Height (mAU) | Area (mAU*s) | Area % |
|-------|-----------------|-------|--------------|--------------|--------|
| 1     | 11.24           | 0.38  | 38.23        | 963.71       | 49.95  |
| 2     | 13.36           | 0.45  | 32.18        | 965.62       | 50.05  |
| Total |                 |       |              | 1929.33      | 100.00 |

Sample Name: KD 980 A1  
 Data file: D:\GONZO\KD\980A1AD.D  
 Sample Info: Laufmittel: n-Heptan/iPrOH 97:3;  
 Die Probe ist in DCM/LM gelöst.

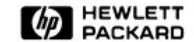

Säule: DAICELAD.M  
 Säuleninfo: Chiralpak AD (250x4,6)mm  
 Operator: Analytik Labor AKEN

Injektion Time: 11:32:45  
 Injektion Date: 17.11.2014

Instrument Conditions: At Start  
 Temperature in °C: 30.0 °C  
 Pressure in bar: 25.0  
 Flow in ml/min: 1.00

At Stop  
 Temperature in °C: 30.0 °C  
 Pressure in bar: 26.0  
 Flow in ml/min: 1.00

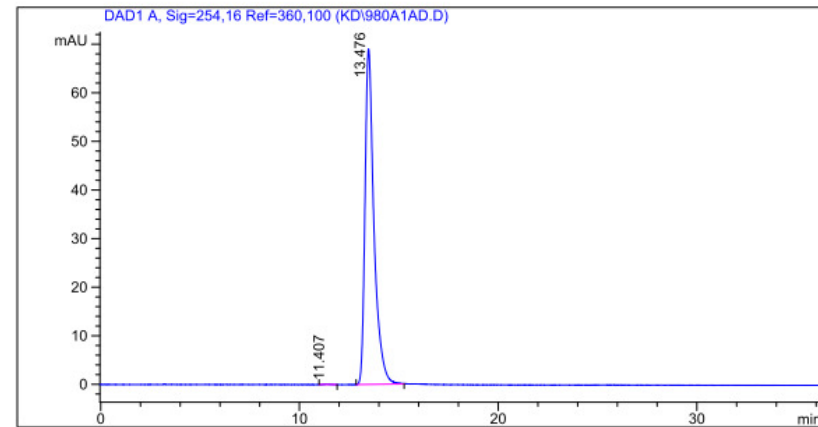

| #     | Ret. Time (min) | Width | Height (mAU) | Area (mAU*s) | Area % |
|-------|-----------------|-------|--------------|--------------|--------|
| 1     | 11.41           | 0.39  | 0.08         | 1.94         | 0.09   |
| 2     | 13.48           | 0.47  | 69.00        | 2172.05      | 99.91  |
| Total |                 |       |              | 2174.00      | 100.00 |

Sample Name: KD 956 A rac  
 Data file: D:\BERT\KD\956AROJ.D  
 Sample Info: Laufmittel: n-Heptan/EtOH 7:3;  
 Die Probe ist in DCM/LM gelöst

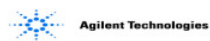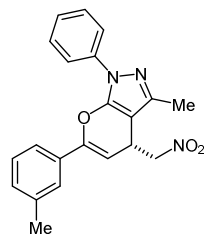

Säule: DAICELOJ.M  
 Säuleninfo: Chiralcel OJ (250x4,6)mm

Operator: Analytik Labor AKEN

Injektion Time: 12:14:51  
 Injektion Date: 24.09.2014

| Instrument Conditions: | At Start | At Stop |
|------------------------|----------|---------|
| Temperature in °C:     | 30.0     | 30.0    |
| Pressure in bar:       | 49.0     | 47.6    |
| Flow in ml/min:        | 1.0      | 1.0     |

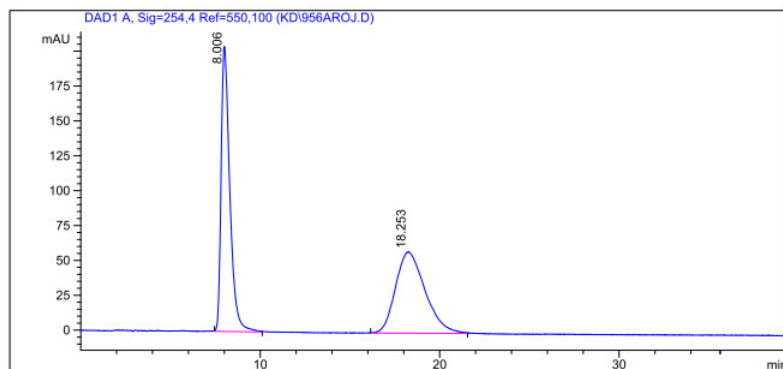

| #     | Ret. Time (min) | Width | Height (mAU) | Area (mAU*s) | Area % |
|-------|-----------------|-------|--------------|--------------|--------|
| 1     | 8.01            | 0.51  | 204.11       | 6884.29      | 50.81  |
| 2     | 18.25           | 1.70  | 58.22        | 6665.27      | 49.19  |
| Total |                 |       |              | 13549.57     | 100.00 |

Sample Name: KD 979 A2  
 Data file: D:\BERT\KD\979A2OJ.D  
 Sample Info: Laufmittel: n-Heptan/EtOH 7:3;  
 Die Probe ist in DCM/LM gelöst

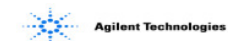

Säule: DAICELOJ.M  
 Säuleninfo: Chiralcel OJ (250x4,6)mm

Operator: Analytik Labor AKEN

Injektion Time: 09:40:39  
 Injektion Date: 17.11.2014

| Instrument Conditions: | At Start | At Stop |
|------------------------|----------|---------|
| Temperature in °C:     | 30.0     | 30.0    |
| Pressure in bar:       | 47.6     | 47.5    |
| Flow in ml/min:        | 1.0      | 1.0     |

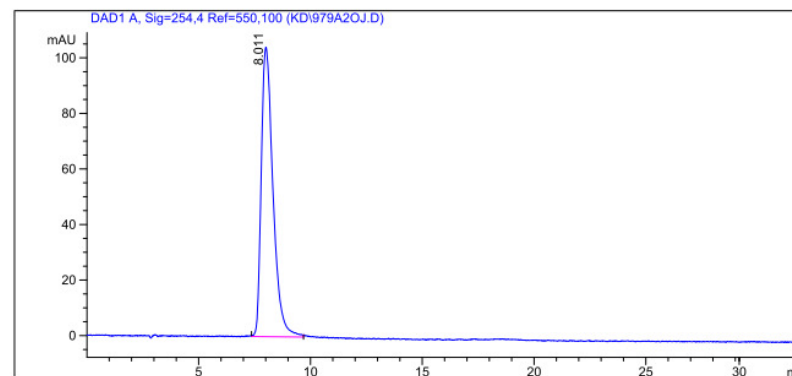

| #     | Ret. Time (min) | Width | Height (mAU) | Area (mAU*s) | Area % |
|-------|-----------------|-------|--------------|--------------|--------|
| 1     | 8.01            | 0.56  | 104.13       | 3806.31      | 100.00 |
| Total |                 |       |              | 3806.31      | 100.00 |

Sample Name: KD 926 A rac  
 Data file: D:\GONZO\KD\926AR10D.D  
 Sample Info: Laufmittel: n-Heptan/iPrOH 9:1;  
 Die Probe ist in DCM/LM gelöst.

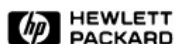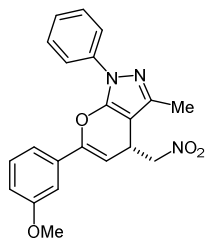

Säule: DAICELOD.M  
 Säuleninfo: Chiralcel OD (250x4,6)mm  
 Operator: Analytik Labor AKEN

Injektion Time: 15:11:57  
 Injektion Date: 06.10.2014

| Instrument Conditions: | At Start | At Stop |
|------------------------|----------|---------|
| Temperature in °C:     | 30.0 °C  | 30.0 °C |
| Pressure in bar:       | 29.2     | 29.6    |
| Flow in ml/min:        | 1.00     | 1.00    |

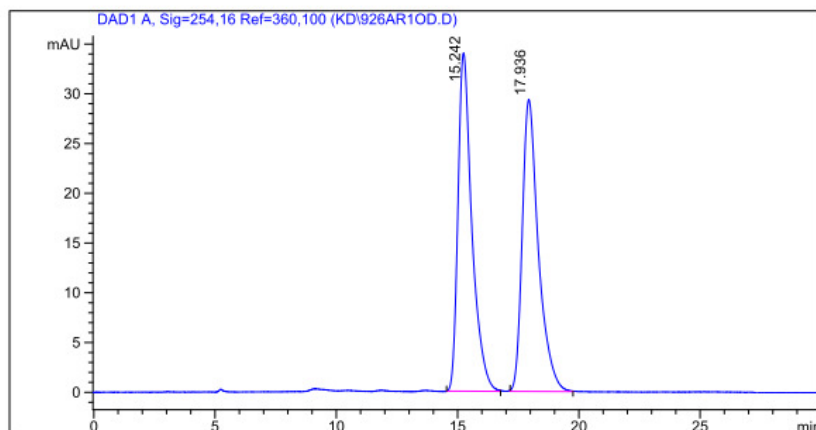

| #     | Ret. Time (min) | Width | Height (mAU) | Area (mAU*s) | Area % |
|-------|-----------------|-------|--------------|--------------|--------|
| 1     | 15.24           | 0.59  | 33.98        | 1352.02      | 49.92  |
| 2     | 17.94           | 0.69  | 29.33        | 1356.46      | 50.08  |
| Total |                 |       |              | 2708.48      | 100.00 |

Sample Name: KD 977 A1  
 Data file: D:\GONZO\KD\977A10D.D  
 Sample Info: Laufmittel: n-Heptan/iPrOH 9:1;  
 Die Probe ist in DCM/LM gelöst.

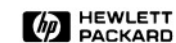

Säule: DAICELOD.M  
 Säuleninfo: Chiralcel OD (250x4,6)mm  
 Operator: Analytik Labor AKEN

Injektion Time: 10:12:11  
 Injektion Date: 13.11.2014

| Instrument Conditions: | At Start | At Stop |
|------------------------|----------|---------|
| Temperature in °C:     | 30.0 °C  | 30.0 °C |
| Pressure in bar:       | 29.7     | 30.3    |
| Flow in ml/min:        | 1.00     | 1.00    |

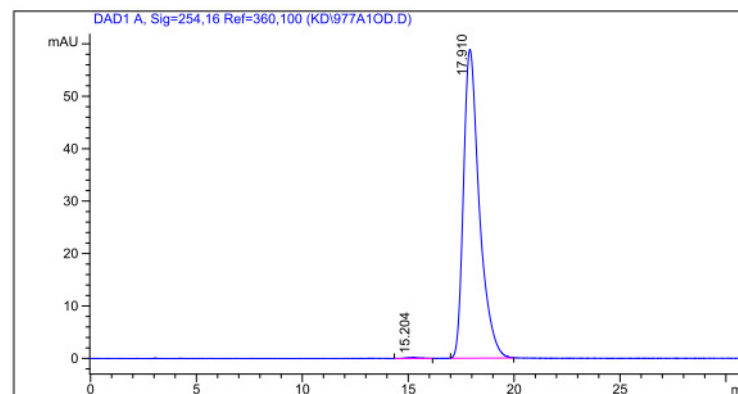

| #     | Ret. Time (min) | Width | Height (mAU) | Area (mAU*s) | Area % |
|-------|-----------------|-------|--------------|--------------|--------|
| 1     | 15.20           | 0.85  | 0.21         | 10.75        | 0.35   |
| 2     | 17.91           | 0.78  | 58.87        | 3058.36      | 99.65  |
| Total |                 |       |              | 3069.11      | 100.00 |

Sample Name: KD 923 A rac  
 Data file: D:\GONZO\KD\923AR1AD.D  
 Sample Info: Laufmittel: n-Heptan/EtOH 95:5;  
 Die Probe ist in DCM/LM gelöst.

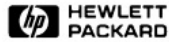

Säule: DAICELAD.M  
 Säuleninfo: Chiralpak AD (250x4,6)mm  
 Operator: Analytik Labor AKEN

Injektion Time: 15:12:08  
 Injektion Date: 22.09.2014

|                        |          |         |
|------------------------|----------|---------|
| Instrument Conditions: | At Start | At Stop |
| Temperature in°C:      | 30.0°C   | 30.0°C  |
| Pressure in bar:       | 24.3     | 24.8    |
| Flow in ml/min:        | 1.00     | 1.00    |

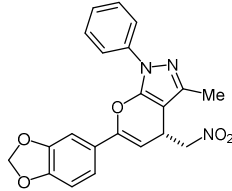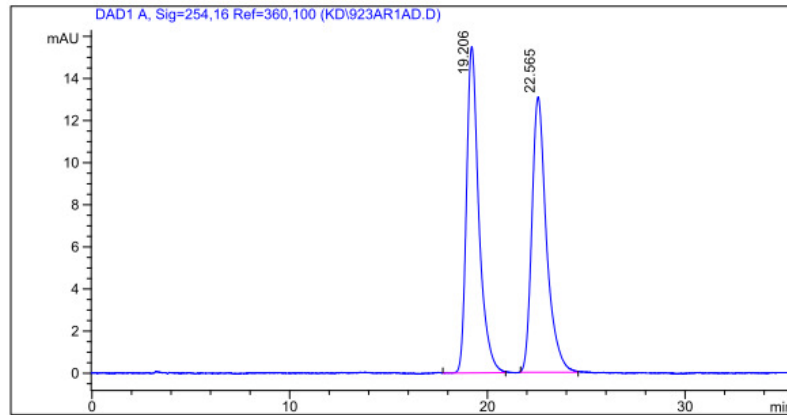

| #     | Ret. Time (min) | Width | Height (mAU) | Area (mAU*s) | Area % |
|-------|-----------------|-------|--------------|--------------|--------|
| 1     | 19.21           | 0.65  | 15.49        | 674.02       | 50.12  |
| 2     | 22.56           | 0.77  | 13.08        | 670.80       | 49.88  |
| Total |                 |       |              | 1344.81      | 100.00 |

Sample Name: KD 981 A  
 Data file: D:\GONZO\KD\981AAD.D  
 Sample Info: Laufmittel: n-Heptan/EtOH 95:5;  
 Die Probe ist in LM/DCM gelöst.

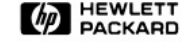

Säule: DAICELAD.M  
 Säuleninfo: Chiralpak AD (250x4,6)mm  
 Operator: Analytik Labor AKEN

Injektion Time: 11:46:33  
 Injektion Date: 30.10.2014

|                        |          |         |
|------------------------|----------|---------|
| Instrument Conditions: | At Start | At Stop |
| Temperature in°C:      | 30.0°C   | 30.0°C  |
| Pressure in bar:       | 25.1     | 25.5    |
| Flow in ml/min:        | 1.00     | 1.00    |

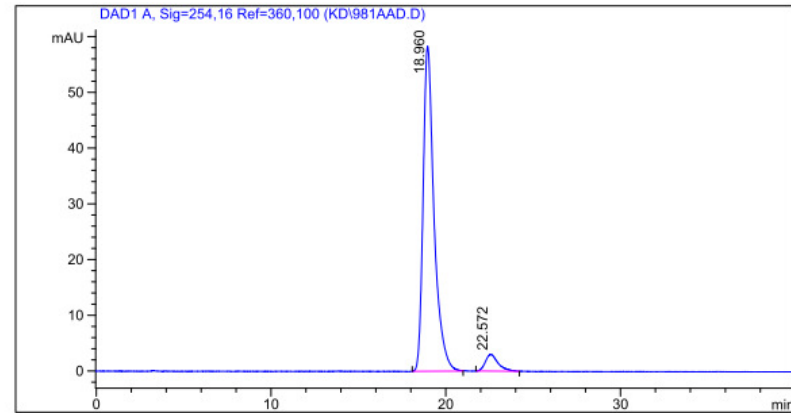

| #     | Ret. Time (min) | Width | Height (mAU) | Area (mAU*s) | Area % |
|-------|-----------------|-------|--------------|--------------|--------|
| 1     | 18.96           | 0.65  | 58.32        | 2539.30      | 94.32  |
| 2     | 22.57           | 0.72  | 3.01         | 153.00       | 5.68   |
| Total |                 |       |              | 2692.30      | 100.00 |



Sample Name: KD 958 A rac  
 Data file: D:\BERT\KD\958AR1OJ.D  
 Sample Info: Laufmittel: n-Heptan/EtOH 7:3;  
 Die Probe ist in DCM/LM gelöst

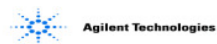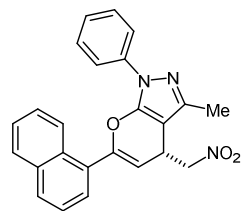

Säule: DAICELOJ.M  
 Säuleninfo: Chiralcel OJ (250x4,6)mm

Operator: Analytik Labor AKEN

Injektion Time: 09:02:19  
 Injektion Date: 10.10.2014

Instrument Conditions: At Start At Stop

Temperature in°C: 30.0 30.0  
 Pressure in bar: 47.4 47.3  
 Flow in ml/min: 1.0 1.0

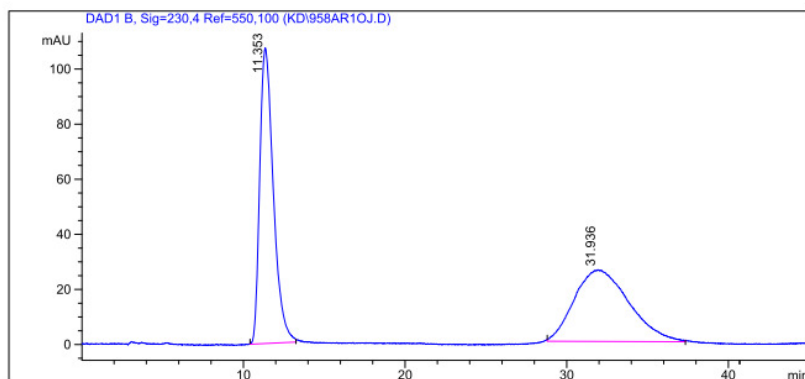

| #     | Ret. Time (min) | Width | Height (mAU) | Area (mAU*s) | Area % |
|-------|-----------------|-------|--------------|--------------|--------|
| 1     | 11.35           | 0.85  | 107.33       | 6265.99      | 50.70  |
| 2     | 31.94           | 2.76  | 26.00        | 6092.04      | 49.30  |
| Total |                 |       |              | 12358.03     | 100.00 |

Sample Name: KD 983 A  
 Data file: D:\BERT\KD\983AOJ.D  
 Sample Info: Laufmittel: n-Heptan/EtOH 7:3;  
 Die Probe ist in DCM/LM gelöst

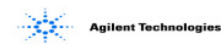

Säule: DAICELOJ.M  
 Säuleninfo: Chiralcel OJ (250x4,6)mm

Operator: Analytik Labor AKEN

Injektion Time: 08:36:44  
 Injektion Date: 31.10.2014

Instrument Conditions: At Start At Stop

Temperature in°C: 30.0 30.0  
 Pressure in bar: 47.9 47.6  
 Flow in ml/min: 1.0 1.0

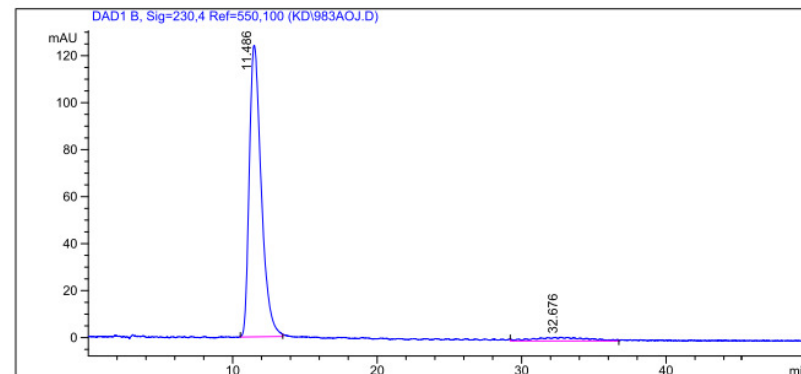

| #     | Ret. Time (min) | Width | Height (mAU) | Area (mAU*s) | Area % |
|-------|-----------------|-------|--------------|--------------|--------|
| 1     | 11.49           | 0.85  | 124.03       | 7143.99      | 94.69  |
| 2     | 32.68           | 4.15  | 1.61         | 400.95       | 5.31   |
| Total |                 |       |              | 7544.94      | 100.00 |

Sample Name: KD 961 A rac  
 Data file: D:\GONZO\KD\961AR2AD.D  
 Sample Info: Laufmittel: n-Heptan/EtOH 97:3;  
 Die Probe ist in DCM/LM gelöst.

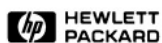

Säule: DAICELAD.M  
 Säuleninfo: Chiralpak AD (250x4,6)mm  
 Operator: Analytik Labor AKEN

Injektion Time: 10:11:15  
 Injektion Date: 08.10.2014

|                        |          |         |
|------------------------|----------|---------|
| Instrument Conditions: | At Start | At Stop |
| Temperature in °C:     | 30.0°C   | 30.0°C  |
| Pressure in bar:       | 24.2     | 24.8    |
| Flow in ml/min:        | 1.00     | 1.00    |

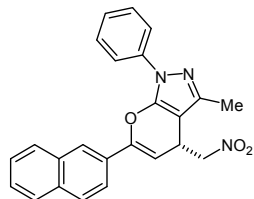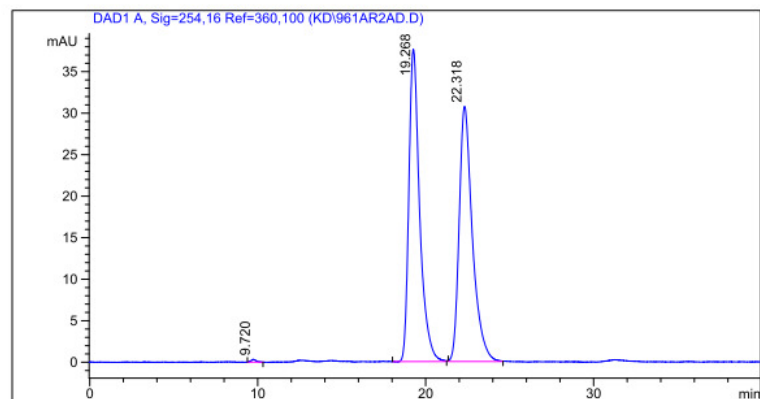

| #     | Ret. Time (min) | Width | Height (mAU) | Area (mAU*s) | Area % |
|-------|-----------------|-------|--------------|--------------|--------|
| 1     | 9.72            | 0.30  | 0.33         | 6.98         | 0.21   |
| 2     | 19.27           | 0.67  | 37.61        | 1680.21      | 49.86  |
| 3     | 22.32           | 0.82  | 30.72        | 1682.39      | 49.93  |
| Total |                 |       |              | 3369.59      | 100.00 |

Sample Name: KD 978 A  
 Data file: D:\GONZO\KD\978AAD.D  
 Sample Info: Laufmittel: n-Heptan/EtOH 97:3;  
 Die Probe ist in DCM/LM gelöst.

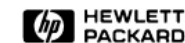

Säule: DAICELAD.M  
 Säuleninfo: Chiralpak AD (250x4,6)mm  
 Operator: Analytik Labor AKEN

Injektion Time: 12:53:46  
 Injektion Date: 29.10.2014

|                        |          |         |
|------------------------|----------|---------|
| Instrument Conditions: | At Start | At Stop |
| Temperature in °C:     | 30.0°C   | 30.0°C  |
| Pressure in bar:       | 24.9     | 25.3    |
| Flow in ml/min:        | 1.00     | 1.00    |

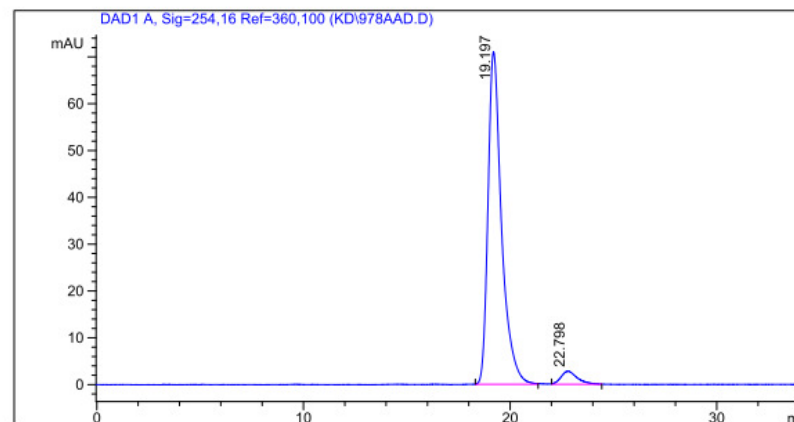

| #     | Ret. Time (min) | Width | Height (mAU) | Area (mAU*s) | Area % |
|-------|-----------------|-------|--------------|--------------|--------|
| 1     | 19.20           | 0.68  | 71.02        | 3239.38      | 95.40  |
| 2     | 22.80           | 0.78  | 2.82         | 156.37       | 4.60   |
| Total |                 |       |              | 3395.75      | 100.00 |

Sample Name: KD 997 A  
Data file: D:\GONZO\KD\997AAD.D  
Sample Info: Laufmittel: n-Heptan/EtOH 97:3;  
Die Probe ist in DCM/LM gelöst.

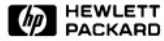

Säule: DAICELAD.M  
Säuleninfo: Chiralpak AD (250x4,6)mm  
Operator: Analytik Labor AKEN

Injektion Time: 12:52:31  
Injektion Date: 17.11.2014

Instrument Conditions: At Start At Stop  
Temperature in °C: 30.0 °C 30.0 °C  
Pressure in bar: 24.8 25.4  
Flow in ml/min: 1.00 1.00

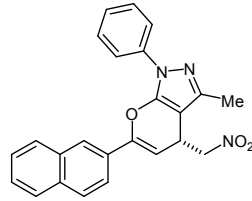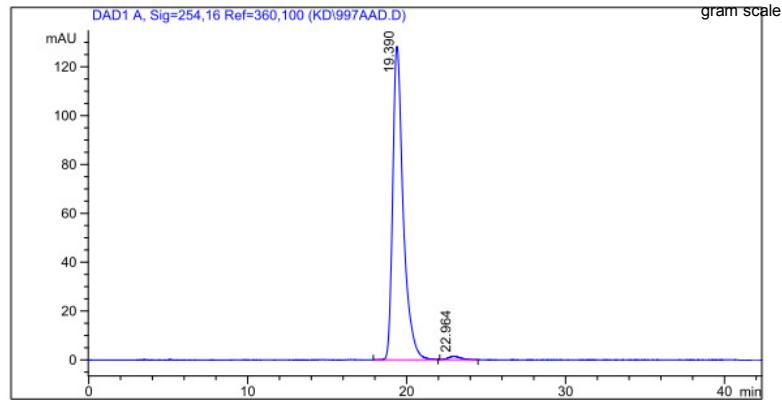

| #     | Ret. Time (min) | Width | Height (mAU) | Area (mAU*s) | Area % |
|-------|-----------------|-------|--------------|--------------|--------|
| 1     | 19.39           | 0.69  | 128.34       | 5911.15      | 98.60  |
| 2     | 22.96           | 0.77  | 1.43         | 83.79        | 1.40   |
| Total |                 |       |              | 5994.94      | 100.00 |

Sample Name: KD 964 A rac  
 Data file: D:\BERT\KD\964AROJ.D  
 Sample Info: Laufmittel: n-Heptan/EtOH 7:3;  
 Die Probe ist in DCM/LM gelöst

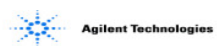

Säule: DAICELOJ.M  
 Säuleninfo: Chiralcel OJ (250x4,6)mm

Operator: Analytik Labor AKEN

Injektion Time: 14:10:35  
 Injektion Date: 22.10.2014

Instrument Conditions: At Start At Stop

Temperature in °C: 30.0 30.0  
 Pressure in bar: 48.2 47.6  
 Flow in ml/min: 1.0 1.0

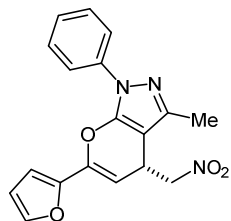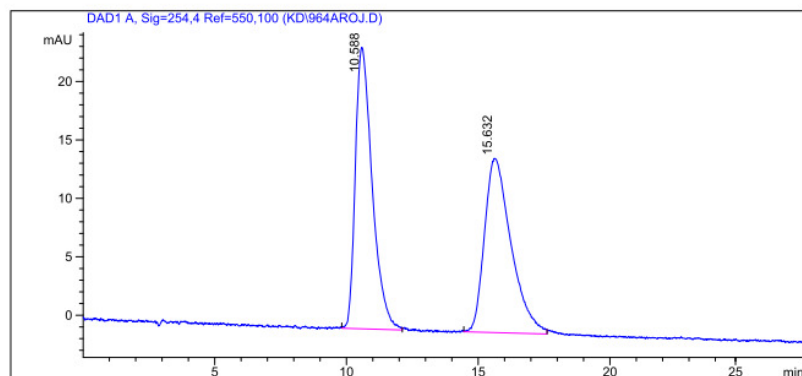

| #     | Ret. Time (min) | Width | Height (mAU) | Area (mAU*s) | Area % |
|-------|-----------------|-------|--------------|--------------|--------|
| 1     | 10.59           | 0.70  | 24.06        | 1074.71      | 50.72  |
| 2     | 15.63           | 1.03  | 14.88        | 1044.25      | 49.28  |
| Total |                 |       |              | 2118.95      | 100.00 |

Sample Name: KD 984 A1  
 Data file: D:\BERT\KD\984A1OJ.D  
 Sample Info: Laufmittel: n-Heptan/EtOH 7:3;  
 Die Probe ist in DCM/LM gelöst

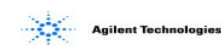

Säule: DAICELOJ.M  
 Säuleninfo: Chiralcel OJ (250x4,6)mm

Operator: Analytik Labor AKEN

Injektion Time: 10:25:52  
 Injektion Date: 13.11.2014

Instrument Conditions: At Start At Stop

Temperature in °C: 30.0 30.0  
 Pressure in bar: 47.6 47.4  
 Flow in ml/min: 1.0 1.0

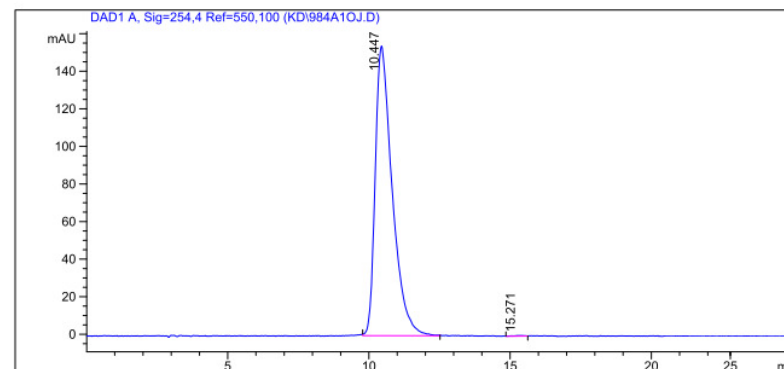

| #     | Ret. Time (min) | Width | Height (mAU) | Area (mAU*s) | Area % |
|-------|-----------------|-------|--------------|--------------|--------|
| 1     | 10.45           | 0.63  | 154.09       | 6443.63      | 99.86  |
| 2     | 15.27           | 0.45  | 0.34         | 9.33         | 0.14   |
| Total |                 |       |              | 6452.96      | 100.00 |

Sample Name: KD 965 A rac  
 Data file: D:\BERT\KD\965AROJ.D  
 Sample Info: Laufmittel: n-Heptan/EtOH 7:3;  
 Die Probe ist in DCM/LM gelöst

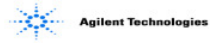

Säule: DAICELOJ.M  
 Säuleninfo: Chiralcel OJ (250x4,6)mm

Operator: Analytik Labor AKEN

Injektion Time: 14:39:40  
 Injektion Date: 22.10.2014

Instrument Conditions: At Start At Stop

Temperature in °C: 30.0 30.0  
 Pressure in bar: 47.7 47.4  
 Flow in ml/min: 1.0 1.0

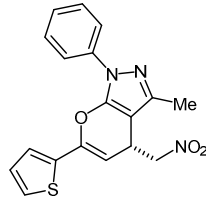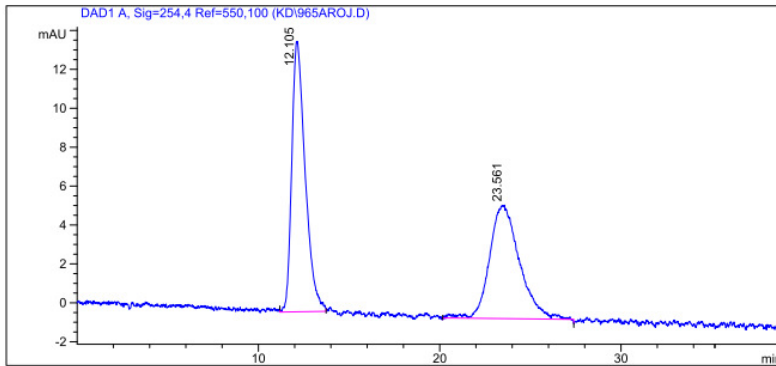

| #     | Ret. Time (min) | Width | Height (mAU) | Area (mAU*s) | Area % |
|-------|-----------------|-------|--------------|--------------|--------|
| 1     | 12.11           | 0.86  | 13.92        | 714.58       | 51.59  |
| 2     | 23.56           | 1.92  | 5.83         | 670.65       | 48.41  |
| Total |                 |       |              | 1385.23      | 100.00 |

Sample Name: KD 991 A1  
 Data file: D:\BERT\KD\991A1OJ.D  
 Sample Info: Laufmittel: n-Heptan/EtOH 7:3;  
 Die Probe ist in DCM/LM gelöst

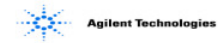

Säule: DAICELOJ.M  
 Säuleninfo: Chiralcel OJ (250x4,6)mm

Operator: Analytik Labor AKEN

Injektion Time: 10:14:57  
 Injektion Date: 17.11.2014

Instrument Conditions: At Start At Stop

Temperature in °C: 30.0 30.0  
 Pressure in bar: 48.3 47.3  
 Flow in ml/min: 1.0 1.0

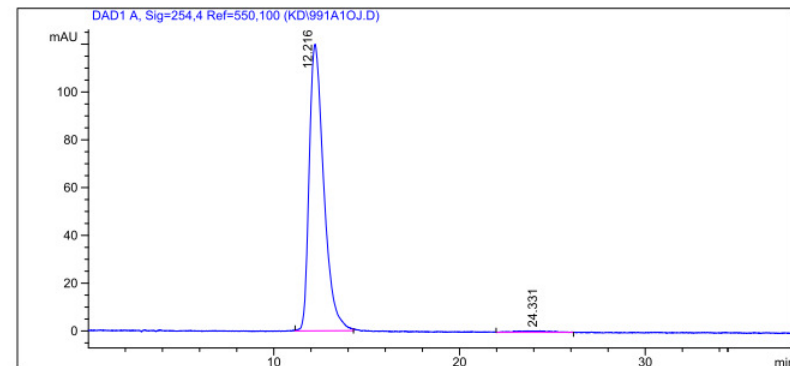

| #     | Ret. Time (min) | Width | Height (mAU) | Area (mAU*s) | Area % |
|-------|-----------------|-------|--------------|--------------|--------|
| 1     | 12.22           | 0.82  | 119.87       | 6533.81      | 98.78  |
| 2     | 24.33           | 2.03  | 0.66         | 80.74        | 1.22   |
| Total |                 |       |              | 6614.55      | 100.00 |

Sample name: KD 966 A rac  
 Data file: C:\SNOOPY\KD\966ARXIA.D  
 Description: Laufmittel: n-Heptan/EtOH 9:1; Probe ist in LM/DCM gelöst.  
 Injection date: 10/24/2014 10:20:56 AM  
 Acq. Analysis method: CHIRALPAKIARNP.M

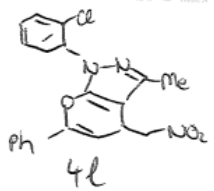

Column: Chiralpak IA, (250 x 4.6) mm, 5µ, SN: IA00CE-RC036

Pressure at start: 25 bar Start flow: 0.500 ml/min Column oven: 30 °C

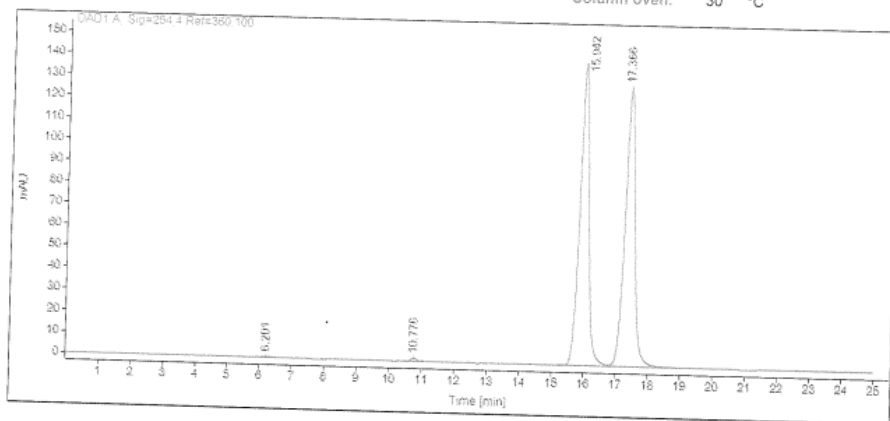

| Name | RT [min] | Type | Area%  | Area    | Height | Width [min] |
|------|----------|------|--------|---------|--------|-------------|
|      | 6.20     | BB   | 0.08   | 4.30    | 0.48   | 0.14        |
|      | 10.78    | BB   | 0.34   | 19.14   | 1.62   | 0.18        |
|      | 15.94    | BV   | 49.67  | 2794.43 | 140.94 | 0.30        |
|      | 17.37    | VB   | 49.91  | 2807.98 | 129.90 | 0.33        |
|      | Sum      |      | 100.00 | 5625.86 |        |             |

Sample name: KD 985 A  
 Data file: C:\SNOOPY\KD\KD 985 A IA.D  
 Description: Laufmittel: n-Heptan/EtOH 9:1 Die Probe ist DCM/LM gelöst.  
 Injection date: 11/3/2014 10:32:38 AM  
 Acq. Analysis method: CHIRALPAKIARNP.M

Column: Chiralpak IA, (250 x 4.6) mm, 5µ, SN: IA00CE-RC036

Pressure at start: 25 bar Start flow: 0.500 ml/min Column oven: 30.01 °C

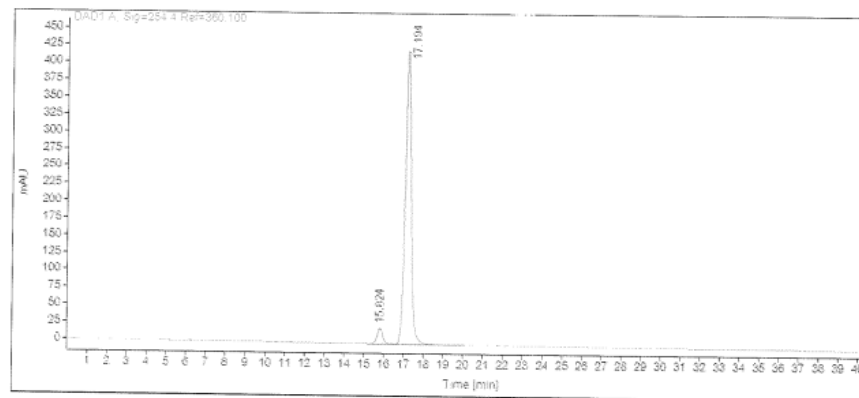

| Name | RT [min] | Type | Area%  | Area    | Height | Width [min] |
|------|----------|------|--------|---------|--------|-------------|
|      | 15.82    | BV   | 4.68   | 443.87  | 22.66  | 0.30        |
|      | 17.19    | VB   | 95.32  | 9039.40 | 423.52 | 0.33        |
|      | Sum      |      | 100.00 | 9483.26 |        |             |

Sample Name: KD 970 A rac  
 Data file: D:\BERT\KD\970AR10J.D  
 Sample Info: Laufmittel: n-Heptan/EtOH 7:3;  
 Die Probe ist in DCM/LM gelöst

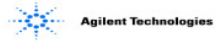

Säule: DAICELOJ.M  
 Säuleninfo: Chiralcel OJ (250x4,6)mm

Operator: Analytik Labor AKEN

Injektion Time: 10:35:54  
 Injektion Date: 29.10.2014

Instrument Conditions: At Start At Stop

Temperature in °C: 30.0 30.0  
 Pressure in bar: 33.0 33.1  
 Flow in ml/min: 0.7 0.7

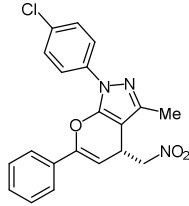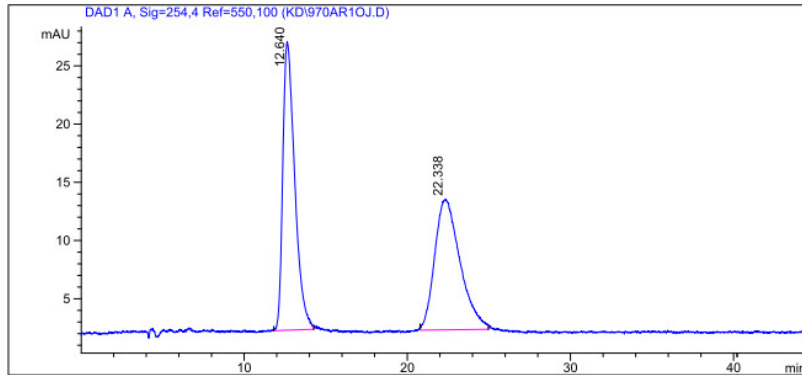

| #     | Ret. Time (min) | Width | Height (mAU) | Area (mAU*s) | Area % |
|-------|-----------------|-------|--------------|--------------|--------|
| 1     | 12.64           | 0.74  | 24.79        | 1260.42      | 50.96  |
| 2     | 22.34           | 1.28  | 11.20        | 1212.93      | 49.04  |
| Total |                 |       |              | 2473.35      | 100.00 |

Sample Name: KD 988 A1  
 Data file: D:\BERT\KD\988A10J.D  
 Sample Info: Laufmittel: n-Heptan/EtOH 7:3;  
 Die Probe ist in DCM/LM gelöst

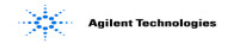

Säule: DAICELOJ.M  
 Säuleninfo: Chiralcel OJ (250x4,6)mm

Operator: Analytik Labor AKEN

Injektion Time: 10:53:20  
 Injektion Date: 13.11.2014

Instrument Conditions: At Start At Stop

Temperature in °C: 30.0 30.0  
 Pressure in bar: 32.8 32.6  
 Flow in ml/min: 0.7 0.7

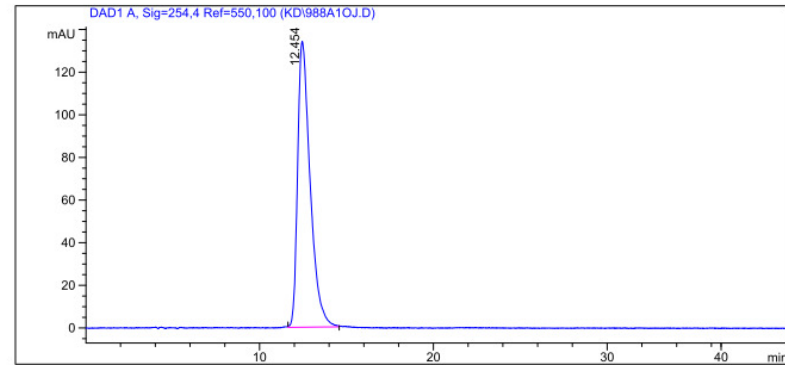

| #     | Ret. Time (min) | Width | Height (mAU) | Area (mAU*s) | Area % |
|-------|-----------------|-------|--------------|--------------|--------|
| 1     | 12.45           | 0.74  | 134.08       | 6713.31      | 100.00 |
| Total |                 |       |              | 6713.31      | 100.00 |

Sample Name: KD 963 A rac  
 Data file: D:\GONZO\KD\963ARAD.D  
 Sample Info: Laufmittel: n-Heptan/iPrOH 9:1;  
 Die Probe ist in DCM/LM gelöst.

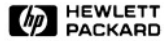

Säule: DAICELAD.M  
 Säuleninfo: Chiralpak AD (250x4,6)mm  
 Operator: Analytik Labor AKEN

Injektion Time: 10:02:04  
 Injektion Date: 27.10.2014

|                        |          |         |
|------------------------|----------|---------|
| Instrument Conditions: | At Start | At Stop |
| Temperature in °C:     | 30.0°C   | 30.0°C  |
| Pressure in bar:       | 26.0     | 26.3    |
| Flow in ml/min:        | 1.00     | 1.00    |

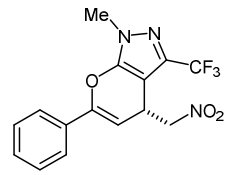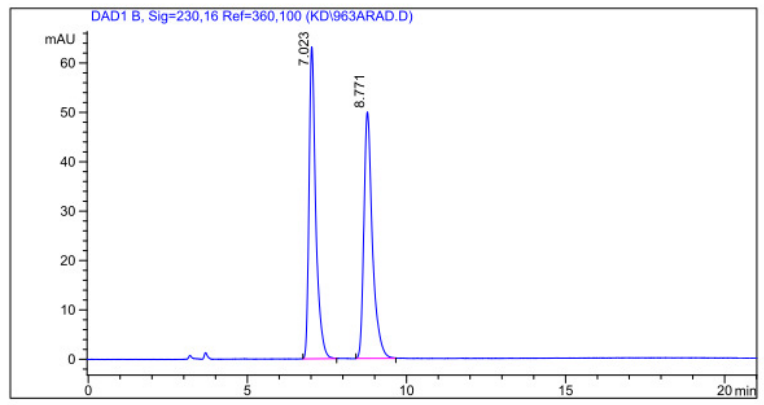

| #     | Ret. Time (min) | Width | Height (mAU) | Area (mAU*s) | Area % |
|-------|-----------------|-------|--------------|--------------|--------|
| 1     | 7.02            | 0.22  | 63.15        | 931.13       | 50.01  |
| 2     | 8.77            | 0.28  | 49.90        | 930.94       | 49.99  |
| Total |                 |       |              | 1862.07      | 100.00 |

Sample Name: KD 986 A1  
 Data file: D:\GONZO\KD\986A1AD.D  
 Sample Info: Laufmittel: n-Heptan/iPrOH 9:1;  
 Die Probe ist in DCM/LM gelöst.

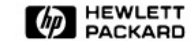

Säule: DAICELAD.M  
 Säuleninfo: Chiralpak AD (250x4,6)mm  
 Operator: Analytik Labor AKEN

Injektion Time: 15:49:22  
 Injektion Date: 17.11.2014

|                        |          |         |
|------------------------|----------|---------|
| Instrument Conditions: | At Start | At Stop |
| Temperature in °C:     | 30.0°C   | 30.0°C  |
| Pressure in bar:       | 26.6     | 26.9    |
| Flow in ml/min:        | 1.00     | 1.00    |

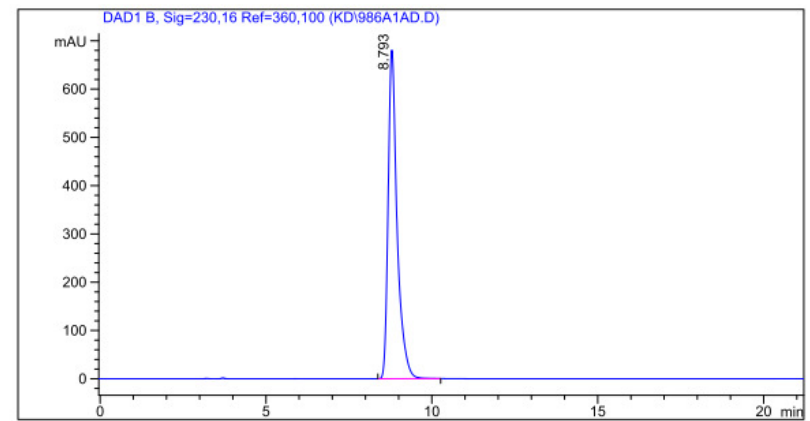

| #     | Ret. Time (min) | Width | Height (mAU) | Area (mAU*s) | Area % |
|-------|-----------------|-------|--------------|--------------|--------|
| 1     | 8.79            | 0.28  | 680.67       | 12811.64     | 100.00 |
| Total |                 |       |              | 12811.64     | 100.00 |



Sample name: **KD 969 A rac**  
 Data file: C:\SNOOPY\KD\KD 969 A RAC IA.D  
 Description: Laufmittel: n-Heptan/EtOH 9:1 Die Probe ist DCM/LM gelöst.  
 Injection date: 10/28/2014 10:12:08 AM  
 Acq. Analysis method: CHIRALPAKIARNP.M  
 Column: Chiralpak IA, (250 x 4,6) mm, 5µ, SN: IA00CE-RC036

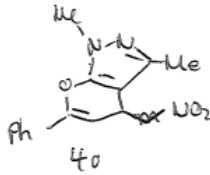

Pressure at start: 51 bar Start flow: 1.000 ml/min Column oven: 29.99 °C

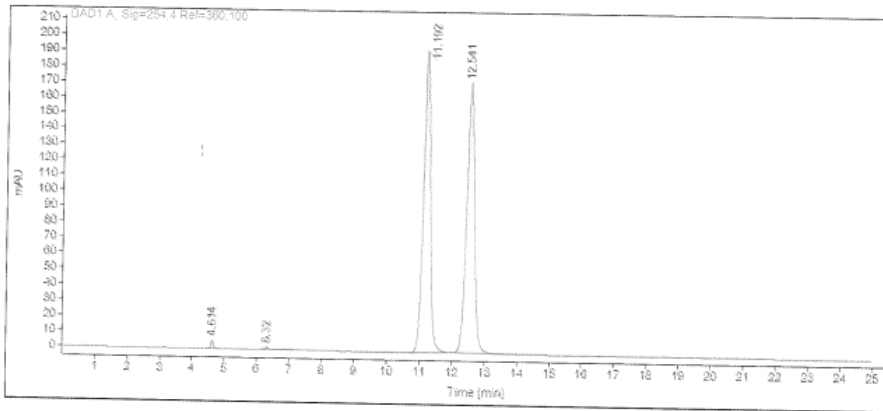

| Name | RT [min] | Type | Area%  | Area    | Height | Width [min] |
|------|----------|------|--------|---------|--------|-------------|
|      | 4.61     | BV   | 0.48   | 27.86   | 5.25   | 0.08        |
|      | 6.32     | BB   | 0.19   | 10.89   | 1.21   | 0.13        |
|      | 11.19    | BB   | 49.64  | 2888.63 | 193.22 | 0.23        |
|      | 12.54    | BB   | 49.69  | 2891.73 | 172.44 | 0.26        |
| Sum  |          |      | 100.00 | 5819.11 |        |             |

Sample name: **KD 996 A1**  
 Data file: C:\SNOOPY\KD\KD 996 A1 IA.D  
 Description: Laufmittel: n-Heptan/EtOH 9:1 Die Probe ist DCM/LM gelöst.  
 Injection date: 11/18/2014 1:15:57 PM  
 Acq. Analysis method: CHIRALPAKIARNP.M  
 Column: Chiralpak IA, (250 x 4,6) mm, 5µ, SN: IA00CE-RC036

Pressure at start: 51 bar Start flow: 1.000 ml/min Column oven: 30 °C

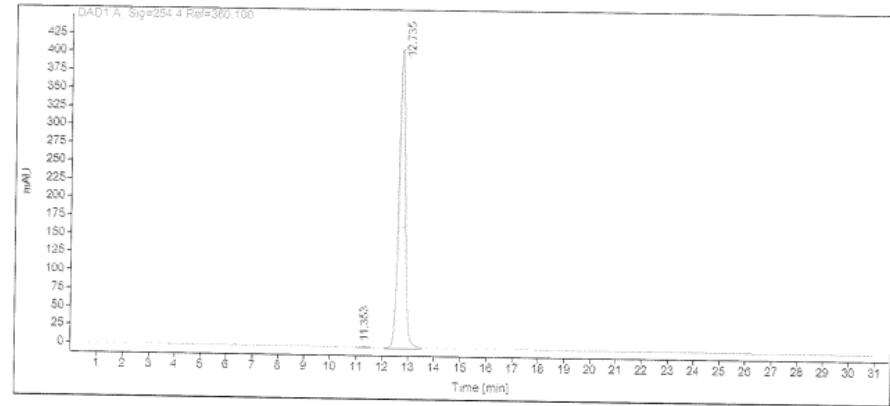

| Name | RT [min] | Type | Area%  | Area    | Height | Width [min] |
|------|----------|------|--------|---------|--------|-------------|
|      | 11.35    | MM   | 0.33   | 23.25   | 1.37   | 0.28        |
|      | 12.73    | MM   | 99.67  | 7111.50 | 411.92 | 0.29        |
| Sum  |          |      | 100.00 | 7134.74 |        |             |

Sample name: **KD 968 A rac**  
 Data file: C:\SNOOPY\KD\968ARXIA.D  
 Description: Laufmittel: n-Heptan/EtOH 9:1;  
 Probe ist in LM/DCM gelöst.  
 Injection date: 10/24/2014 10:47:02 AM  
 Acq. Analysis method: CHIRALPAKIARNP.M

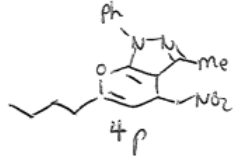

Column: Chiralpak IA, (250 x 4,6) mm, 5µ, SN: IA00CE-RC036

Pressure at start: 26 bar Start flow: 0.500 ml/min Column oven: 29.99 °C

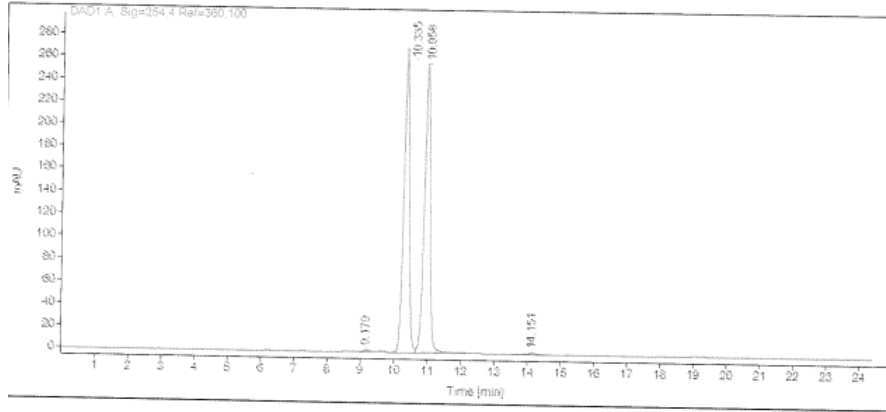

| Name | RT [min] | Type | Area%  | Area    | Height | Width [min] |
|------|----------|------|--------|---------|--------|-------------|
|      | 9.18     | VB   | 0.29   | 18.18   | 1.69   | 0.17        |
|      | 10.33    | BV   | 49.25  | 3106.08 | 270.62 | 0.18        |
|      | 10.96    | VB   | 50.12  | 3161.09 | 256.32 | 0.19        |
|      | 14.15    | BB   | 0.34   | 21.19   | 1.09   | 0.31        |
| Sum  |          |      | 100.00 | 6306.54 |        |             |

Sample name: **KD 995 A1**  
 Data file: C:\SNOOPY\KD\KD 995 A1 IA.D  
 Description: Laufmittel: n-Heptan/EtOH 9:1 Die Probe ist DCM/LM gelöst.  
 Injection date: 11/19/2014 9:05:28 AM  
 Acq. Analysis method: CHIRALPAKIARNP.M

Column: Chiralpak IA, (250 x 4,6) mm, 5µ, SN: IA00CE-RC036

Pressure at start: 26 bar Start flow: 0.500 ml/min Column oven: 29.99 °C

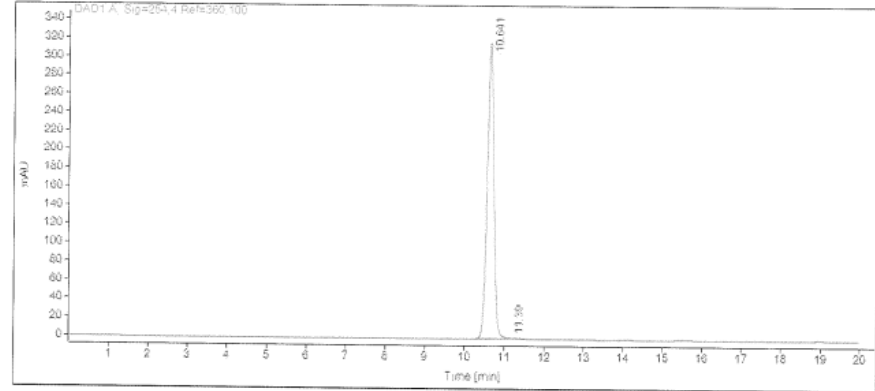

| Name | RT [min] | Type | Area%  | Area    | Height | Width [min] |
|------|----------|------|--------|---------|--------|-------------|
|      | 10.64    | MM   | 99.90  | 3713.02 | 316.73 | 0.20        |
|      | 11.39    | MM   | 0.10   | 3.86    | 0.32   | 0.20        |
| Sum  |          |      | 100.00 | 3716.88 |        |             |

Sample Name: KD 967 A rac  
 Data file: D:\GONZO\KD\967AR10D.D  
 Sample Info: Laufmittel: n-Heptan/iPrOH 9:1;  
 Die Probe ist in DCM/LM gelöst.

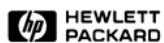

Säule: DAICELOD.M  
 Säuleninfo: Chiralcel OD (250x4,6)mm  
 Operator: Analytik Labor AKEN

Injektion Time: 11:01:35  
 Injektion Date: 23.10.2014

|                        |          |         |
|------------------------|----------|---------|
| Instrument Conditions: | At Start | At Stop |
| Temperature in °C:     | 30.0 °C  | 30.0 °C |
| Pressure in bar:       | 12.4     | 12.5    |
| Flow in ml/min:        | 0.50     | 0.50    |

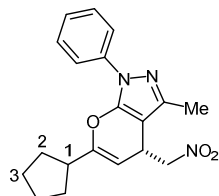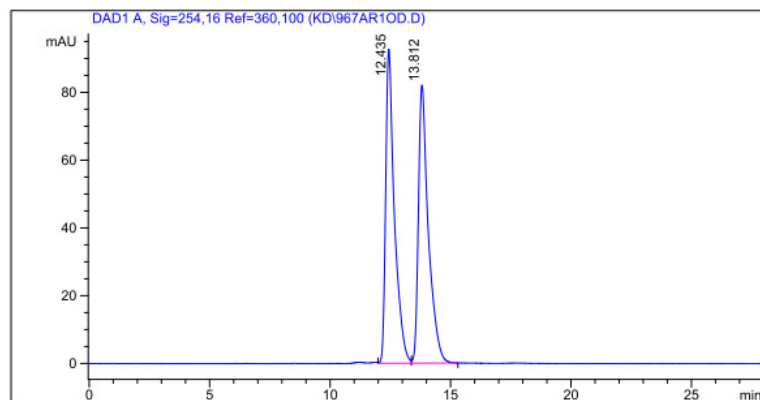

| #     | Ret. Time (min) | Width | Height (mAU) | Area (mAU*s) | Area % |
|-------|-----------------|-------|--------------|--------------|--------|
| 1     | 12.43           | 0.36  | 92.56        | 2338.99      | 49.85  |
| 2     | 13.81           | 0.41  | 82.02        | 2353.53      | 50.15  |
| Total |                 |       |              | 4692.52      | 100.00 |

Sample Name: KD 992 A1  
 Data file: D:\GONZO\KD\992A10D.D  
 Sample Info: Laufmittel: n-Heptan/iPrOH 9:1;  
 Die Probe ist in DCM/LM gelöst

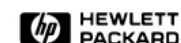

Säule: DAICELOD.M  
 Säuleninfo: Chiralcel OD (250x4,6)mm  
 Operator: Analytik Labor AKEN

Injektion Time: 16:46:06  
 Injektion Date: 17.11.2014

|                        |          |         |
|------------------------|----------|---------|
| Instrument Conditions: | At Start | At Stop |
| Temperature in °C:     | 30.0 °C  | 30.0 °C |
| Pressure in bar:       | 12.7     | 12.9    |
| Flow in ml/min:        | 0.50     | 0.50    |

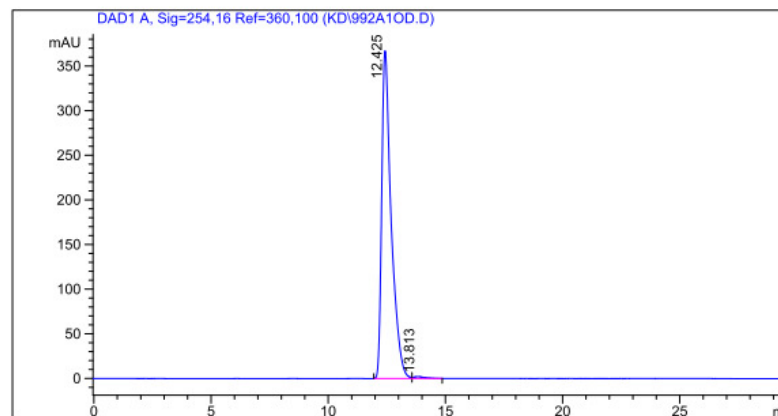

| #     | Ret. Time (min) | Width | Height (mAU) | Area (mAU*s) | Area % |
|-------|-----------------|-------|--------------|--------------|--------|
| 1     | 12.43           | 0.41  | 367.05       | 10326.38     | 99.29  |
| 2     | 13.81           | 0.47  | 2.14         | 73.70        | 0.71   |
| Total |                 |       |              | 10400.08     | 100.00 |
